# Supplementary material for: Neuropathologist-level integrated classification of adult-type diffuse gliomas using deep learning from whole-slide pathological images
Source: PubMed Central journal article supplement (PMC10567721; doi:10.1038/s41467-023-41195-9), 2023-10-11
Supplement: 41467_2023_41195_MOESM3_ESM.pdf [file 41467_2023_41195_MOESM3_ESM.pdf]

### **Description of additional Supplementary File**

**Supplementary Data 1:** The classification performance of the MIL diagnostic model. The top, second, third and bottom rows for each type/grade indicate the performance on the internal validation cohort, internal testing cohort, and external testing cohort 1 and 2, respectively. Task 1: classifying the six categories. Task 2: classifying the three types. Task 3: classifying IDH-wildtype diffuse astrocytic tumors and IDH-mutant astrocytoma grade 2 and 3. Task 4: classifying IDH-mutant GBM in 2016 WHO classification (classified as IDH-mutant A4 in 2021 rule) and IDH-wildtype GBM. Task 5-6: classifying grades within types. Task 7: classifying IDH-mutant A and IDH-mutant 1p/19q-codeleted O.

**Supplementary Data 2:** The classification performance of the all-patch diagnostic model. The top, second, third and bottom rows for each type/grade indicate the performance on the internal validation cohort, internal testing cohort, and external testing cohort 1 and 2, respectively. Task 1: classifying the six categories. Task 2: classifying the three types. Task 3: classifying IDH-wildtype diffuse astrocytic tumors and IDH-mutant astrocytoma grade 2 and 3. Task 4: classifying IDH-mutant GBM in 2016 WHO classification (classified as IDH-mutant A4 in 2021 rule) and IDH-wildtype GBM. Task 5-6: classifying grades within types. Task 7: classifying IDH-mutant A and IDH-mutant 1p/19q-codeleted O.
